# Supplementary material
Source: Springer Nature journal article supplement (https://www.springermedizin.de/resource/supplementary/12889_2013_6730_MOESM2_ESM.pdf/9498666)
Supplement: MOESM2 [file 9498666]

*Demographic*

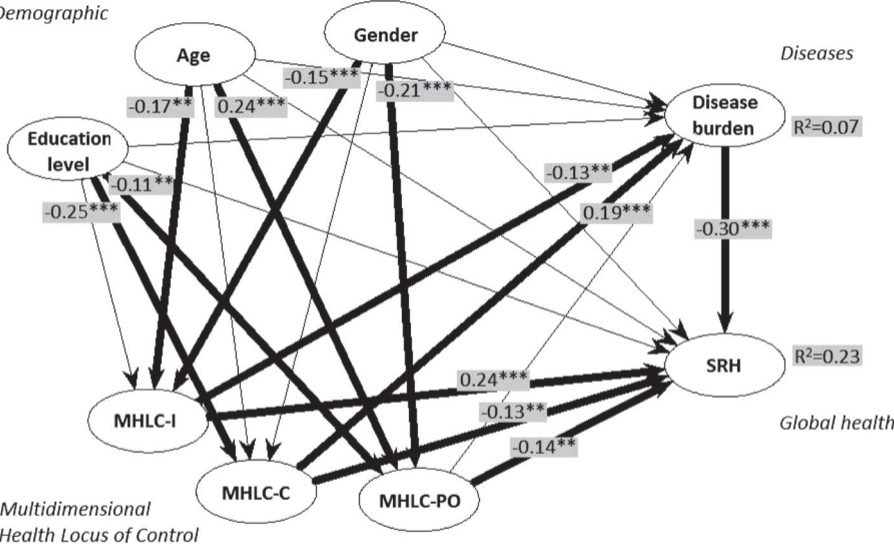

\* Patch is significant at the 0.05 level

\*\* Patch is significant at the 0.01 level

\*\*\* Patch is significant at the 0.001 level
